# Supplementary material for: A simultaneously GSH-depleted bimetallic Cu(ii) complex for enhanced chemodynamic cancer therapy
Source: Royal Society of Chemistry journal article supplement (doi:10.1039/d0dt01742f), 2020-01-01
Supplement: d0dt01742f1.pdf [file d0dt01742f1.pdf]

# Simultaneously GSH-Depleted Bimetallic Cu(II) Complex for Enhanced Chemodynamic Cancer Therapy

Shuhua Cao<sup>a</sup>, Xuezhao Li<sup>b\*</sup>, Yong Gao<sup>c</sup>, Fahui Li<sup>d</sup>, Kaixue Li<sup>a</sup>, Xuanxuan Cao<sup>a</sup>, Yiwen Dai<sup>a</sup>, Lirong Mao<sup>a</sup>, Shanshan Wang<sup>a</sup> and Xishi Tai<sup>a\*</sup>

a. College of Chemistry, Chemical and Environmental Engineering, Weifang University, No. 5147 Dongfeng Street, Weifang, 261061, P. R. China. E-mail: taixs@wfu.edu.cn

b. State Key Laboratory of Fine Chemicals, Dalian University of Technology, No. 2 Linggong Road, Dalian 116024, P. R. China. E-mail: xuezhao@dlut.edu.cn

c. Dongying Shengli Hospital, No.107 Beier Road, Dongying, 257055, P. R. China

d. School of Pharmacy, Weifang Medical University, No. 7166 Baotong Street, Weifang, 261053, P. R. China

## Table of Contents

|                                                      |            |
|------------------------------------------------------|------------|
| <b>S1. Synthetic Procedures.....</b>                 | <b>2</b>   |
| <b>S2. NMR Spectra.....</b>                          | <b>2-4</b> |
| <b>S3. HR-ESI mass spectra.....</b>                  | <b>4-6</b> |
| <b>S4. IR spectra.....</b>                           | <b>6</b>   |
| <b>S5. Single crystal X-ray crystallography.....</b> | <b>7-9</b> |
| <b>S6. IC<sub>50</sub> values.....</b>               | <b>9</b>   |
| <b>S7. Reference.....</b>                            | <b>9</b>   |

## S1 Synthetic Procedures

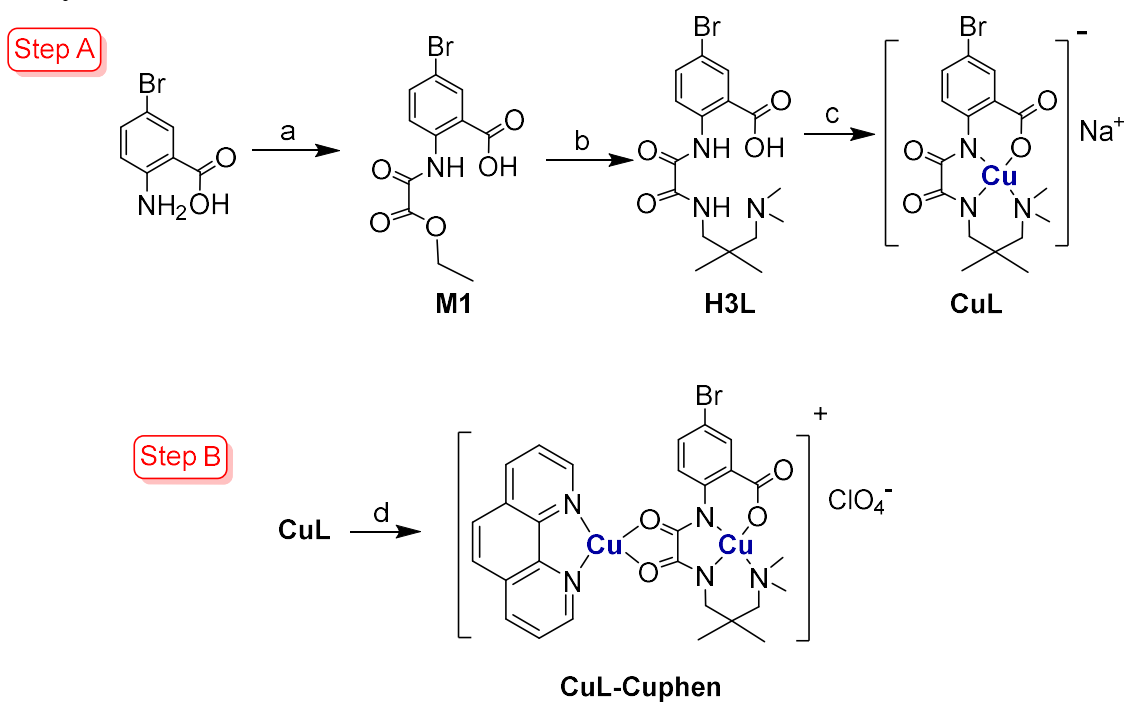

**Scheme 1.** Schematic representation of the stepwise assembly route of bimetallic Cu(II) complex CuL-Cuphen.

## S2. NMR Spectra

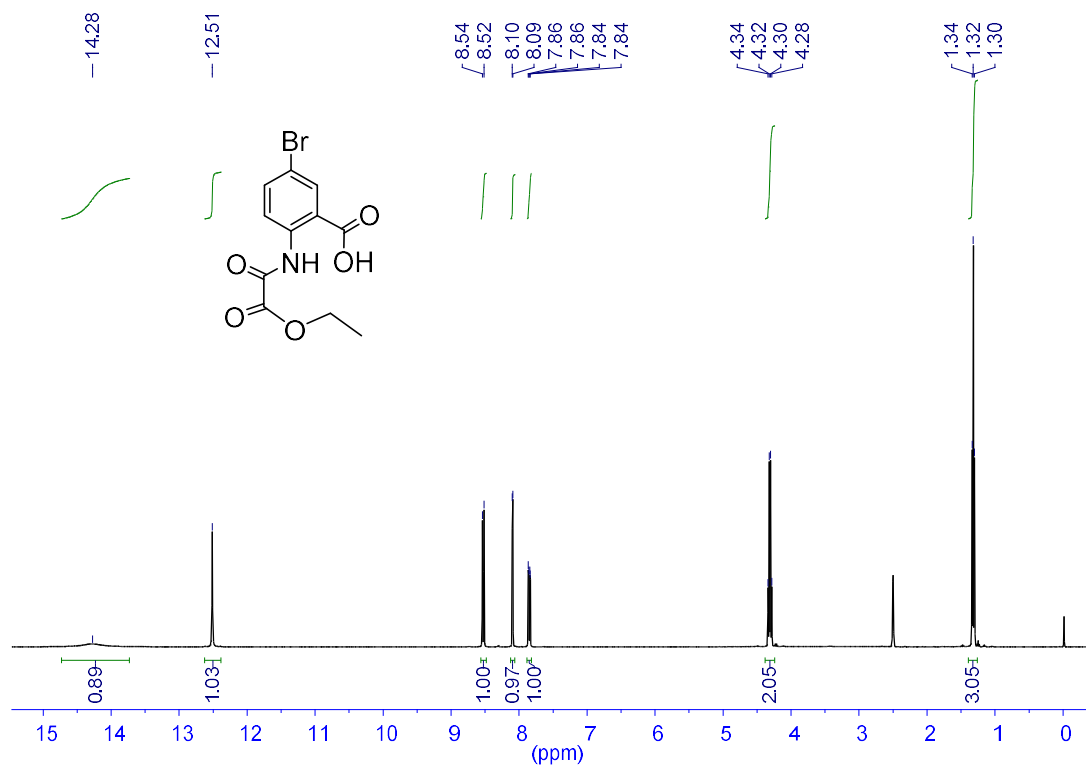

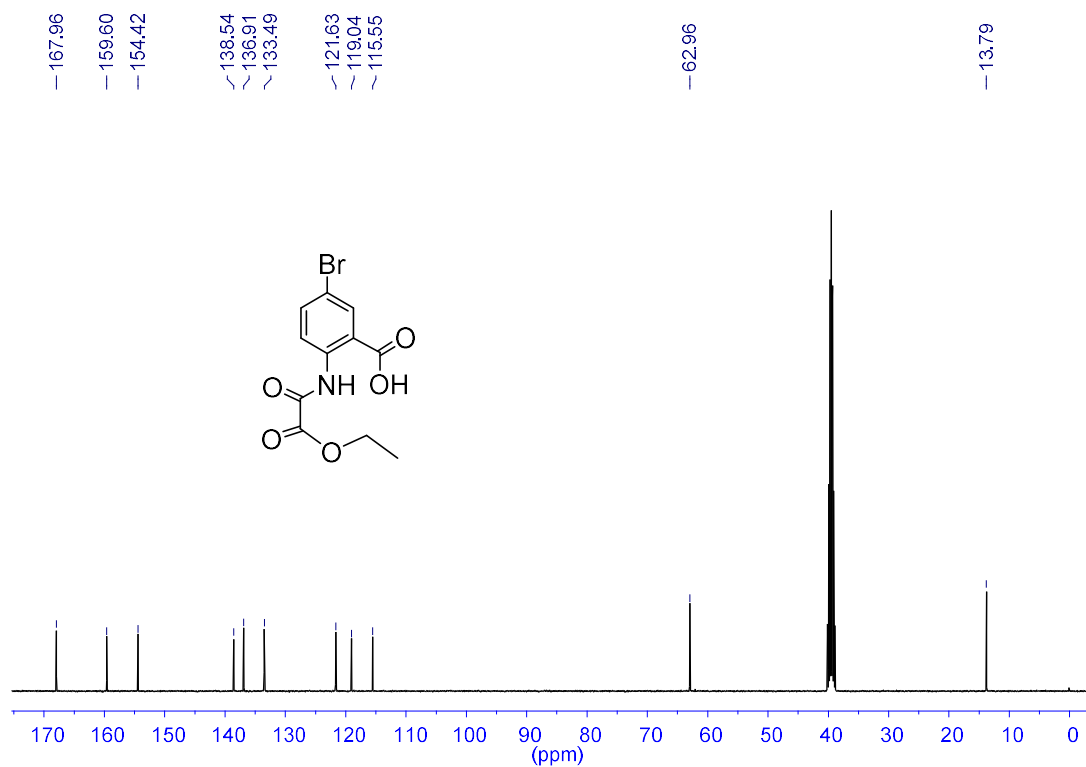

Figure S2. <sup>13</sup>C NMR spectrum (100 MHz, d<sup>6</sup>-DMSO) of M1.

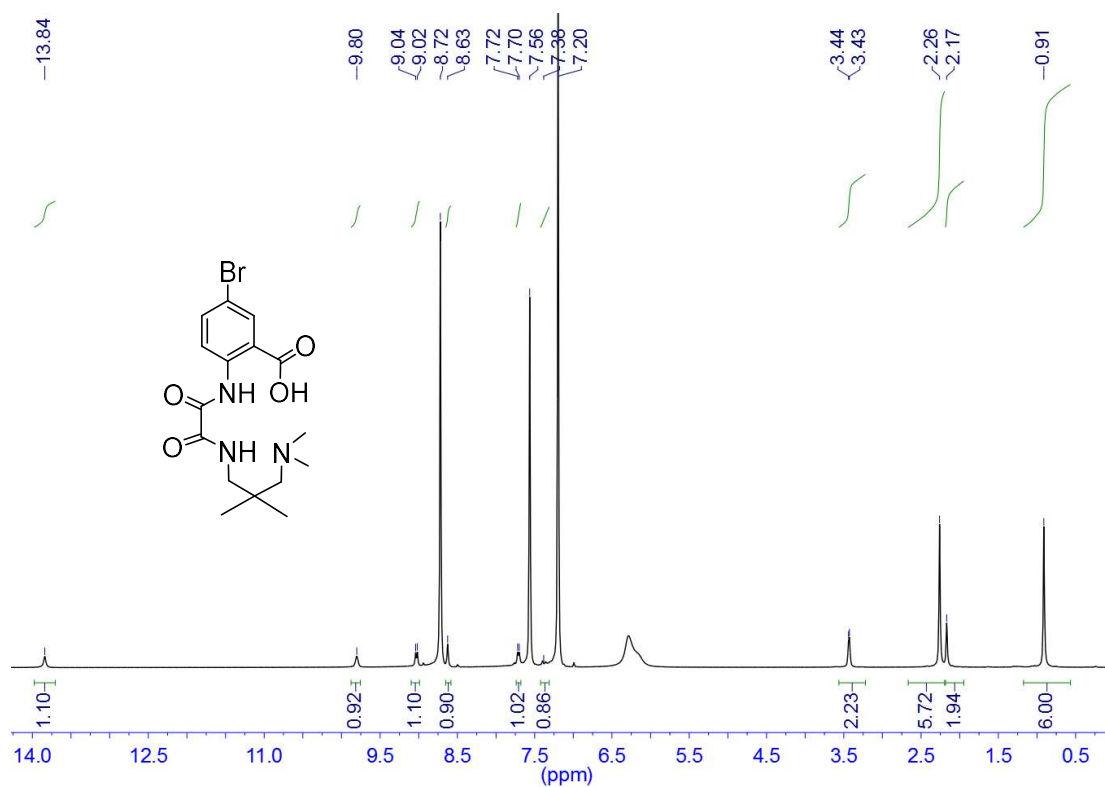

Figure S3. <sup>1</sup>H NMR spectrum (400 MHz, C<sub>5</sub>D<sub>5</sub>N) of H<sub>3</sub>L

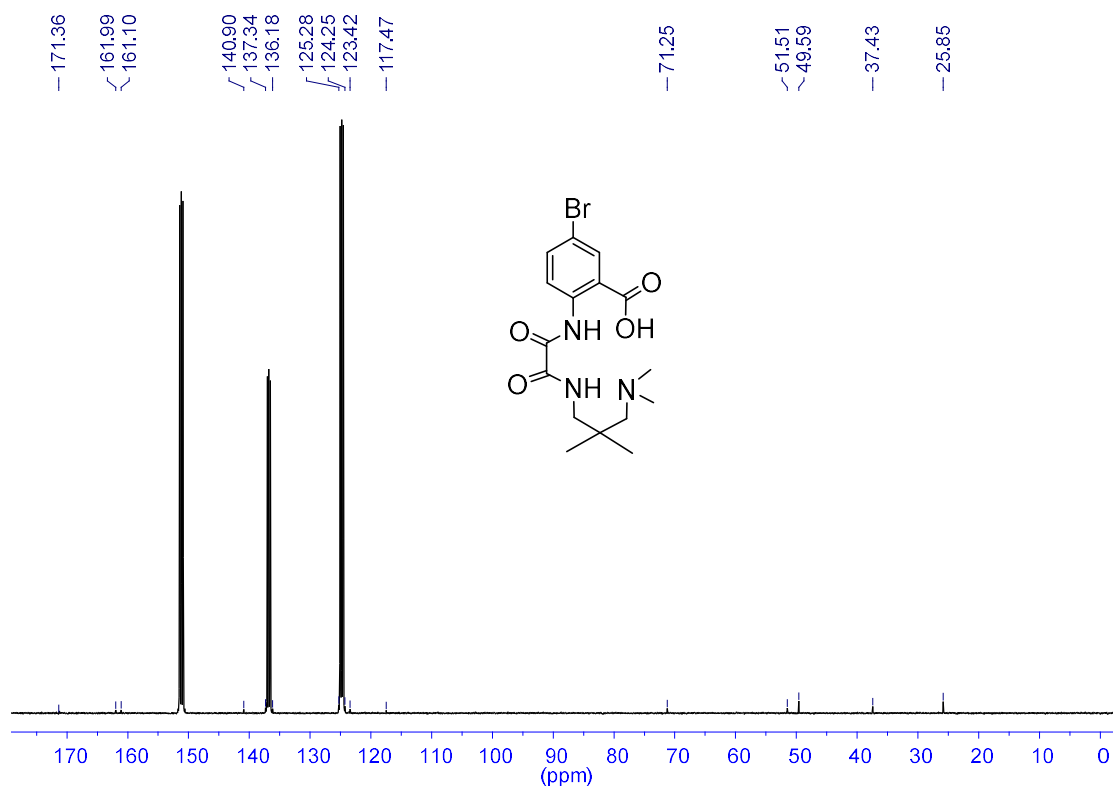

**Figure S4.**  $^{13}\text{C}$  NMR spectrum (100 MHz,  $\text{C}_5\text{D}_5\text{N}$ ) of **H3L**

### S3. HR-ESI mass spectra

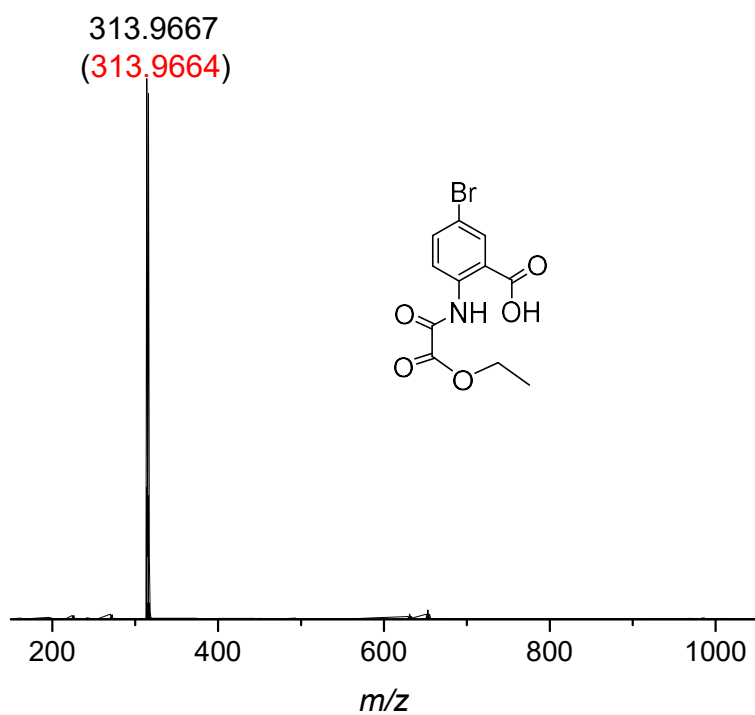

**Figure S5.** HR-ESI mass spectrum of **M1** in  $\text{CH}_3\text{OH}$ . The simulated spectra for  $[\text{M1-H}]^-$ , calcd for  $\text{C}_{11}\text{H}_9\text{BrNO}_5^-$ : 313.9664; found: 313.9667.

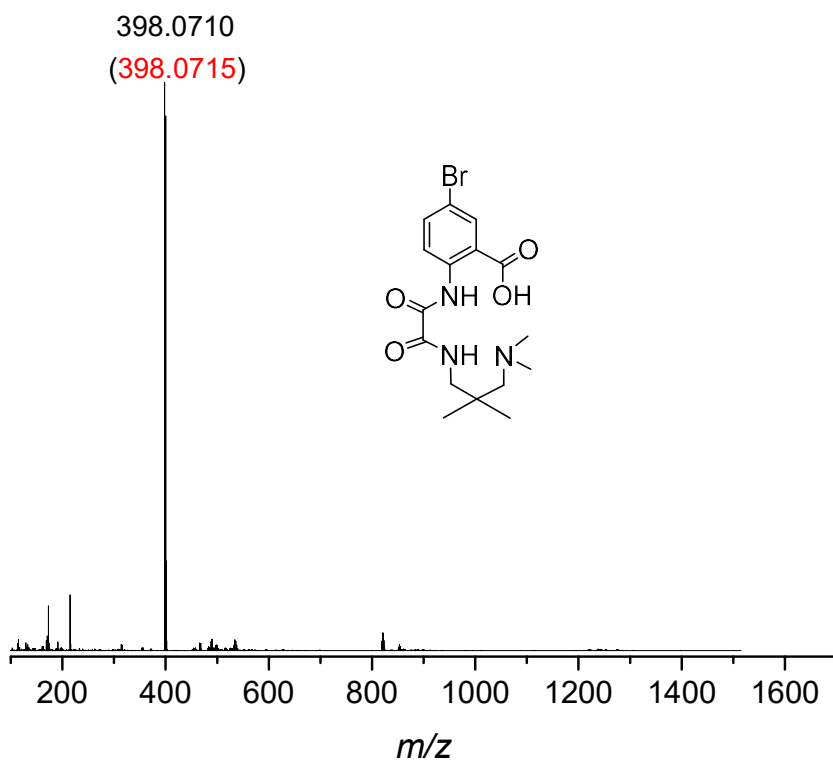

**Figure S6.** HR-ESI mass spectrum of **H3L** in CH<sub>3</sub>OH. The simulated spectra for [H3L-H]<sup>-</sup>, calcd. for C<sub>16</sub>H<sub>21</sub>BrN<sub>3</sub>O<sub>4</sub><sup>-</sup>: 398.0715; found: 398.0710.

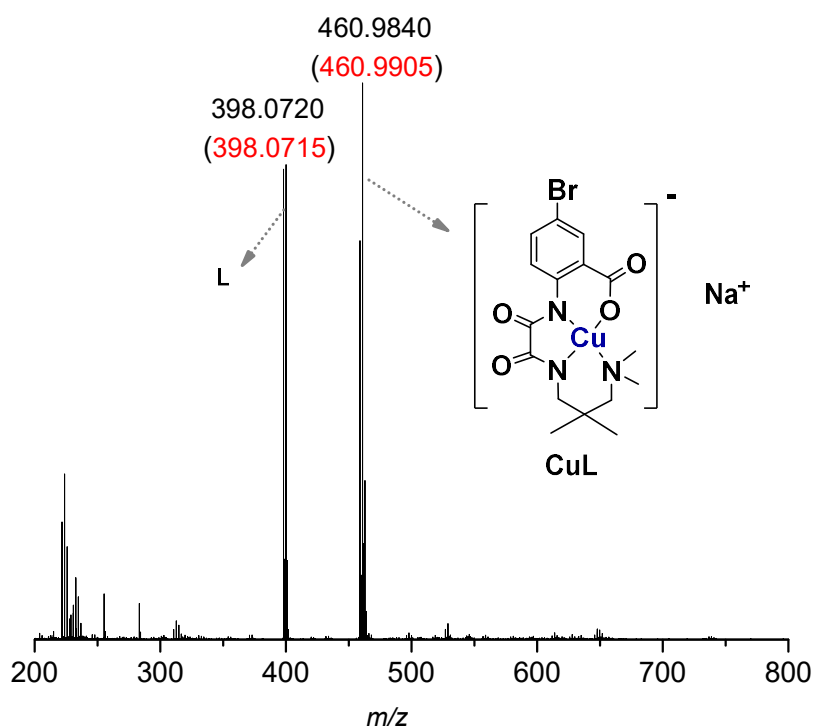

**Figure S7.** HR-ESI mass spectrum of **CuL** in CH<sub>3</sub>OH. The simulated spectra for [CuL]<sup>-</sup>, calcd. for CuC<sub>16</sub>H<sub>19</sub>BrN<sub>3</sub>O<sub>4</sub><sup>-</sup>: 460.9905; found: 460.9840.

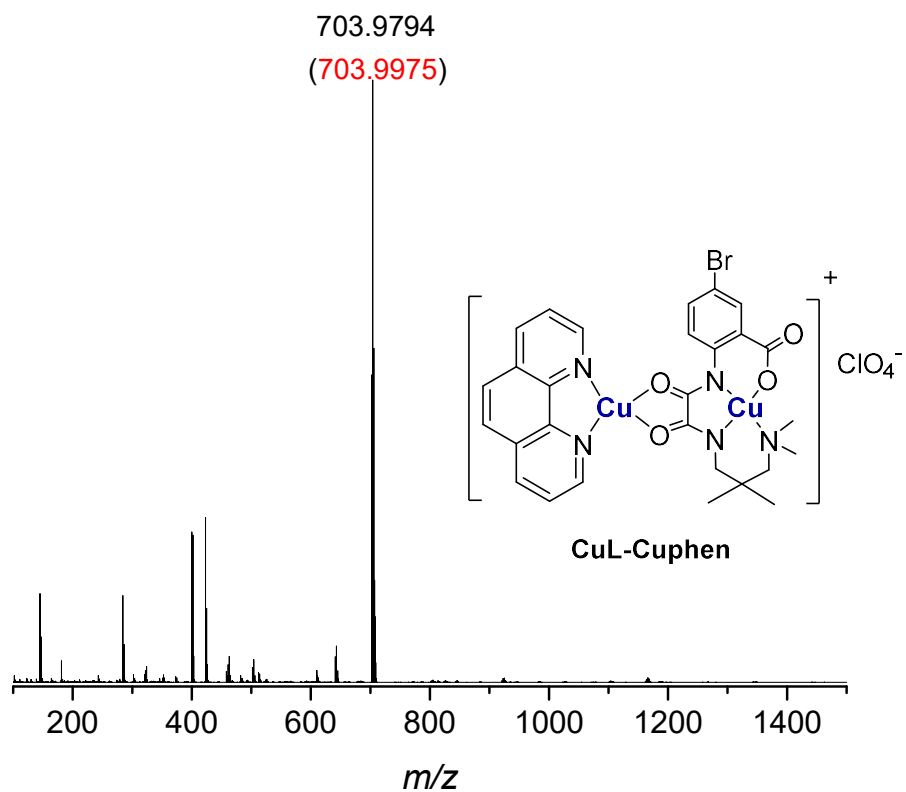

**Figure S8.** HR-ESI mass spectrum of **CuL-Cuphen** in  $\text{CH}_3\text{OH}$ . The simulated spectra for  $[\text{CuL-Cuphen}]^+$ , calcd. for  $\text{Cu}_2\text{C}_{28}\text{H}_{27}\text{BrN}_5\text{O}_4^+$ : 703.9975; found: 703.9794.

#### S4 IR spectra

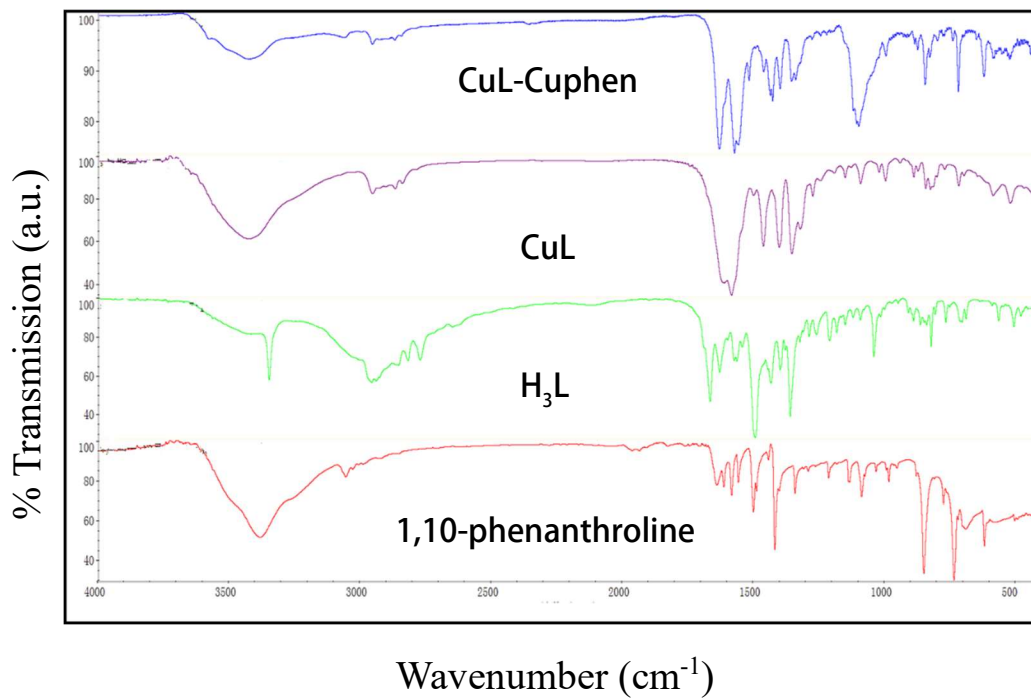

**Figure S9.** IR spectrum of 1,10-phenanthroline,  $\text{H}_3\text{L}$ , **CuL**, and **CuL-Cuphen**.

## S5 Single crystal X-ray crystallography.

Table S1 Bond Lengths for CuL-Cuphen.

| Atom | Atom            | Length/Å  | Atom | Atom             | Length/Å  |
|------|-----------------|-----------|------|------------------|-----------|
| Cu1  | O1              | 1.917(12) | O1   | C1               | 1.274(19) |
| Cu1  | N2              | 1.961(14) | O2   | C1               | 1.285(19) |
| Cu1  | N1              | 2.051(13) | O2   | Cu2 <sup>1</sup> | 2.290(12) |
| Cu1  | N3              | 2.065(13) | O3   | C8               | 1.224(18) |
| Cu2  | O4              | 1.946(10) | O4   | C9               | 1.295(18) |
| Cu2  | O3              | 1.964(11) | C1   | C2               | 1.53(2)   |
| Cu2  | N5              | 2.021(13) | C2   | C7               | 1.35(2)   |
| Cu2  | N4              | 2.059(14) | C2   | C3               | 1.43(2)   |
| Cu2  | O2 <sup>1</sup> | 2.290(12) | C3   | C4               | 1.40(2)   |
| Br1  | C6              | 1.940(15) | C4   | C5               | 1.32(2)   |
| Cl1  | O6              | 1.40(7)   | C5   | C6               | 1.42(2)   |
| Cl1  | O5              | 1.40(9)   | C6   | C7               | 1.41(2)   |
| Cl1  | O6'             | 1.40(7)   | C8   | C9               | 1.56(2)   |
| Cl1  | O7'             | 1.40(8)   | C10  | C11              | 1.57(2)   |
| Cl1  | O8'             | 1.41(10)  | C11  | C14              | 1.50(3)   |
| Cl1  | O7              | 1.41(7)   | C11  | C13              | 1.52(2)   |
| Cl1  | O5'             | 1.41(4)   | C11  | C12              | 1.55(2)   |
| Cl1  | O8              | 1.42(11)  | C17  | C18              | 1.45(2)   |
| N1   | C8              | 1.38(2)   | C18  | C19              | 1.35(2)   |
| N1   | C3              | 1.39(2)   | C19  | C20              | 1.46(2)   |
| N2   | C9              | 1.294(19) | C20  | C21              | 1.35(2)   |
| N2   | C10             | 1.537(19) | C20  | C27              | 1.51(2)   |
| N3   | C12             | 1.53(2)   | C21  | C22              | 1.44(2)   |
| N3   | C16             | 1.54(3)   | C22  | C23              | 1.45(2)   |
| N3   | C15             | 1.56(2)   | C23  | C28              | 1.42(2)   |
| N4   | C17             | 1.253(19) | C23  | C24              | 1.46(2)   |
| N4   | C21             | 1.41(2)   | C24  | C25              | 1.39(2)   |
| N5   | C26             | 1.351(19) | C25  | C26              | 1.43(2)   |
| N5   | C22             | 1.37(2)   | C27  | C28              | 1.28(2)   |

Table S2 Bond Angles for CuL-Cuphen.

| Atom | Atom | Atom | Angle/°  | Atom | Atom | Atom | Angle/°   |
|------|------|------|----------|------|------|------|-----------|
| O1   | Cu1  | N2   | 174.4(5) | C21  | N4   | Cu2  | 110.2(10) |
| O1   | Cu1  | N1   | 90.3(5)  | C26  | N5   | C22  | 119.4(14) |
| N2   | Cu1  | N1   | 84.8(5)  | C26  | N5   | Cu2  | 130.1(11) |

|     |     |                 |          |     |     |                  |           |
|-----|-----|-----------------|----------|-----|-----|------------------|-----------|
| O1  | Cu1 | N3              | 88.6(5)  | C22 | N5  | Cu2              | 110.5(10) |
| N2  | Cu1 | N3              | 95.9(5)  | C1  | O1  | Cu1              | 127.8(11) |
| N1  | Cu1 | N3              | 172.3(6) | C1  | O2  | Cu2 <sup>1</sup> | 120.5(11) |
| O4  | Cu2 | O3              | 84.7(4)  | C8  | O3  | Cu2              | 113.3(10) |
| O4  | Cu2 | N5              | 165.4(5) | C9  | O4  | Cu2              | 111.3(9)  |
| O3  | Cu2 | N5              | 99.3(5)  | O1  | C1  | O2               | 120.7(15) |
| O4  | Cu2 | N4              | 90.0(5)  | O1  | C1  | C2               | 120.5(14) |
| O3  | Cu2 | N4              | 170.1(5) | O2  | C1  | C2               | 117.9(14) |
| N5  | Cu2 | N4              | 83.9(5)  | C7  | C2  | C3               | 123.4(14) |
| O4  | Cu2 | O2 <sup>1</sup> | 100.2(4) | C7  | C2  | C1               | 113.9(14) |
| O3  | Cu2 | O2 <sup>1</sup> | 90.6(4)  | C3  | C2  | C1               | 122.6(14) |
| N5  | Cu2 | O2 <sup>1</sup> | 93.8(4)  | N1  | C3  | C4               | 125.5(15) |
| N4  | Cu2 | O2 <sup>1</sup> | 98.6(5)  | N1  | C3  | C2               | 120.5(14) |
| O6  | C11 | O5              | 110(3)   | C4  | C3  | C2               | 113.9(14) |
| O6  | C11 | O6'             | 37(3)    | C5  | C4  | C3               | 125.4(16) |
| O5  | C11 | O6'             | 138(4)   | C4  | C5  | C6               | 119.3(15) |
| O6  | C11 | O7'             | 85(3)    | C7  | C6  | C5               | 118.9(14) |
| O5  | C11 | O7'             | 29(2)    | C7  | C6  | Br1              | 119.1(12) |
| O6' | C11 | O7'             | 109(3)   | C5  | C6  | Br1              | 122.0(11) |
| O6  | C11 | O8'             | 93(4)    | C2  | C7  | C6               | 119.1(15) |
| O5  | C11 | O8'             | 95(5)    | O3  | C8  | N1               | 131.5(15) |
| O6' | C11 | O8'             | 109(5)   | O3  | C8  | C9               | 115.6(14) |
| O7' | C11 | O8'             | 111(5)   | N1  | C8  | C9               | 112.5(13) |
| O6  | C11 | O7              | 113(3)   | N2  | C9  | O4               | 126.7(14) |
| O5  | C11 | O7              | 109(5)   | N2  | C9  | C8               | 118.1(14) |
| O6' | C11 | O7              | 79(3)    | O4  | C9  | C8               | 115.1(13) |
| O7' | C11 | O7              | 109(4)   | N2  | C10 | C11              | 110.5(13) |
| O8' | C11 | O7              | 133(4)   | C14 | C11 | C13              | 106.0(15) |
| O6  | C11 | O5'             | 147(3)   | C14 | C11 | C12              | 117.4(16) |
| O5  | C11 | O5'             | 93(4)    | C13 | C11 | C12              | 106.4(14) |
| O6' | C11 | O5'             | 111(4)   | C14 | C11 | C10              | 110.2(14) |
| O7' | C11 | O5'             | 109(4)   | C13 | C11 | C10              | 105.7(15) |
| O8' | C11 | O5'             | 108(3)   | C12 | C11 | C10              | 110.3(14) |
| O7  | C11 | O5'             | 35(3)    | N3  | C12 | C11              | 120.7(13) |
| O6  | C11 | O8              | 110(5)   | N4  | C17 | C18              | 125.3(16) |
| O5  | C11 | O8              | 109(6)   | C19 | C18 | C17              | 115.5(15) |
| O6' | C11 | O8              | 109(5)   | C18 | C19 | C20              | 120.3(15) |
| O7' | C11 | O8              | 133(5)   | C21 | C20 | C19              | 118.6(15) |
| O8' | C11 | O8              | 28(4)    | C21 | C20 | C27              | 116.7(15) |
| O7  | C11 | O8              | 105(4)   | C19 | C20 | C27              | 124.6(14) |



|     |     |     |           |     |     |     |           |
|-----|-----|-----|-----------|-----|-----|-----|-----------|
| O5' | C11 | O8  | 82(4)     | C20 | C21 | N4  | 120.1(15) |
| C8  | N1  | C3  | 122.9(13) | C20 | C21 | C22 | 124.2(15) |
| C8  | N1  | Cu1 | 110.6(10) | N4  | C21 | C22 | 115.4(14) |
| C3  | N1  | Cu1 | 126.2(11) | N5  | C22 | C21 | 119.7(14) |
| C9  | N2  | C10 | 114.8(14) | N5  | C22 | C23 | 126.2(15) |
| C9  | N2  | Cu1 | 113.1(10) | C21 | C22 | C23 | 114.0(15) |
| C10 | N2  | Cu1 | 131.2(10) | C28 | C23 | C22 | 122.6(15) |
| C12 | N3  | C16 | 108.6(13) | C28 | C23 | C24 | 126.6(15) |
| C12 | N3  | C15 | 105.6(13) | C22 | C23 | C24 | 110.6(14) |
| C16 | N3  | C15 | 113.2(15) | C25 | C24 | C23 | 124.6(16) |
| C12 | N3  | Cu1 | 116.2(11) | C24 | C25 | C26 | 117.7(15) |
| C16 | N3  | Cu1 | 106.5(10) | N5  | C26 | C25 | 121.3(15) |
| C15 | N3  | Cu1 | 107.0(10) | C28 | C27 | C20 | 122.3(16) |
| C17 | N4  | C21 | 119.6(14) | C27 | C28 | C23 | 119.8(16) |
| C17 | N4  | Cu2 | 129.9(12) |     |     |     |           |

## S6 IC<sub>50</sub> values determination.

All the IC<sub>50</sub> values were determined as duplicates of triplicates in three independent sets of experiments. The raw data were fitted as a sigmoidal dose response using the IC<sub>50</sub> Calculator. The standard deviations were calculated for the three independent experiments using the STDEV function in Excel software.<sup>1</sup>

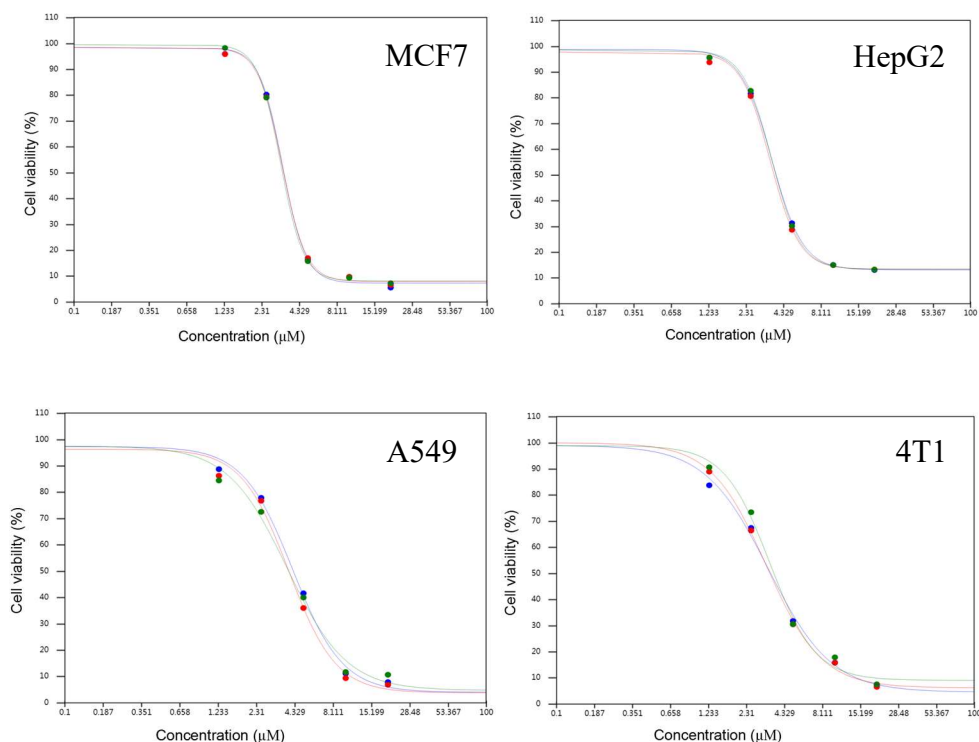

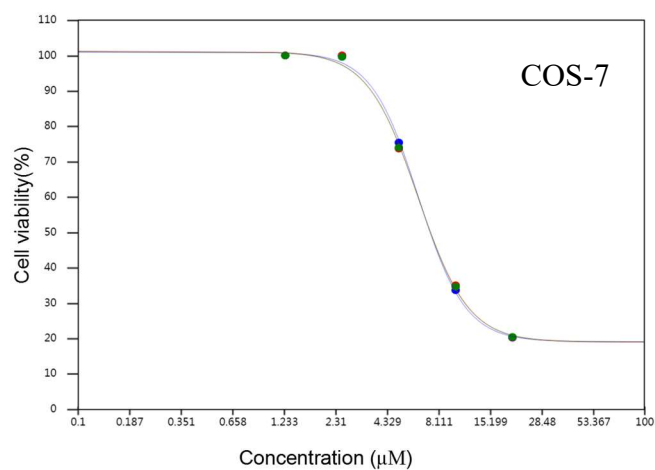

Table S3. The  $IC_{50}$  ( $\mu M$ ) values toward different cells.

| Cells      | MCF7        | HepG2       | A549        | 4T1         | COS7        |
|------------|-------------|-------------|-------------|-------------|-------------|
| CuL-Cuphen | 3.227±0.052 | 3.532±0.055 | 3.984±0.185 | 3.311±0.100 | 6.319±0.022 |
| CuL        | >40         | >40         | >40         | >40         | >40         |

## S7 Reference

1. AAT Bioquest, Inc. (2020, June 16). Quest Graph™  $IC_{50}$  Calculator (v.1). Retrieved from <https://www.aatbio.com/tools/ic50-calculator-v1>.
